# Supplementary material
Source: Springer Nature journal article supplement (https://www.springermedizin.de/resource/supplementary/12968_2013_3954_MOESM7_ESM.pdf/9584962)

Figure 8. **Box Plots of AVJ Motion Variables in HCM Patients and Healthy Volunteers**

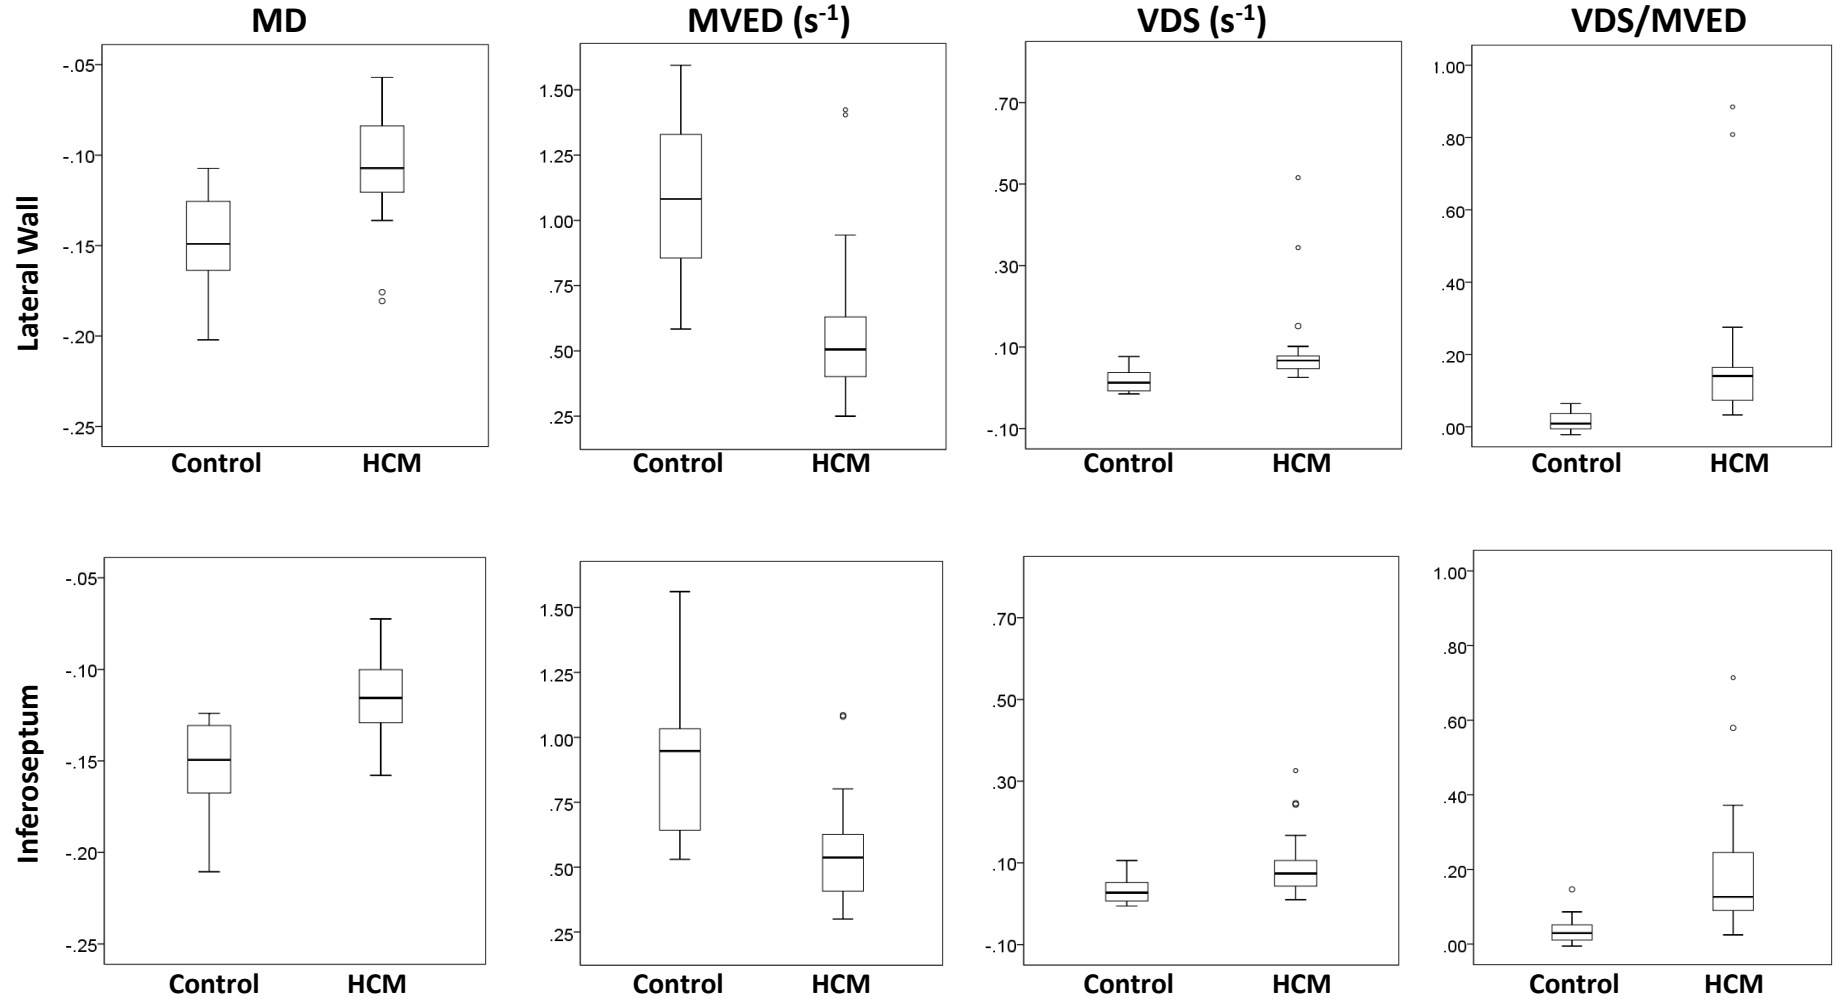

Supplement: MOESM7 [file 9584962]
